# Supplementary material
Source: PubMed Central journal article supplement (PMC4409830)

# Supplementary Figure 1

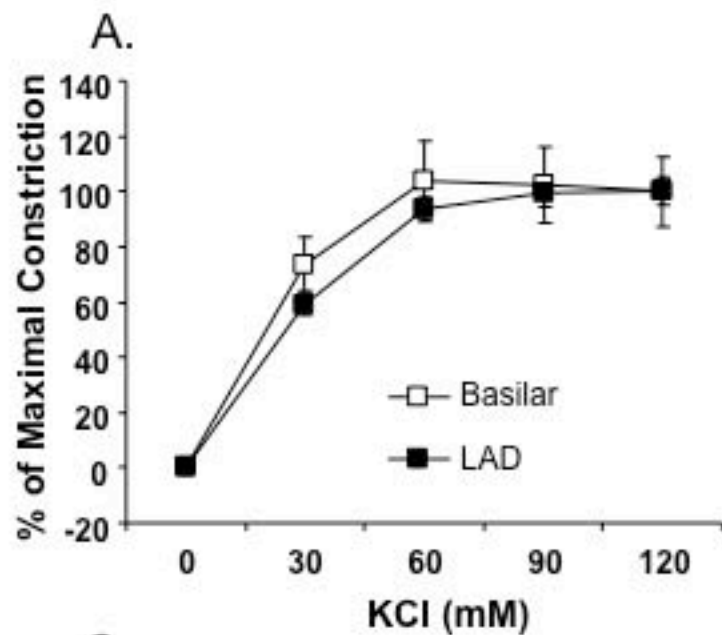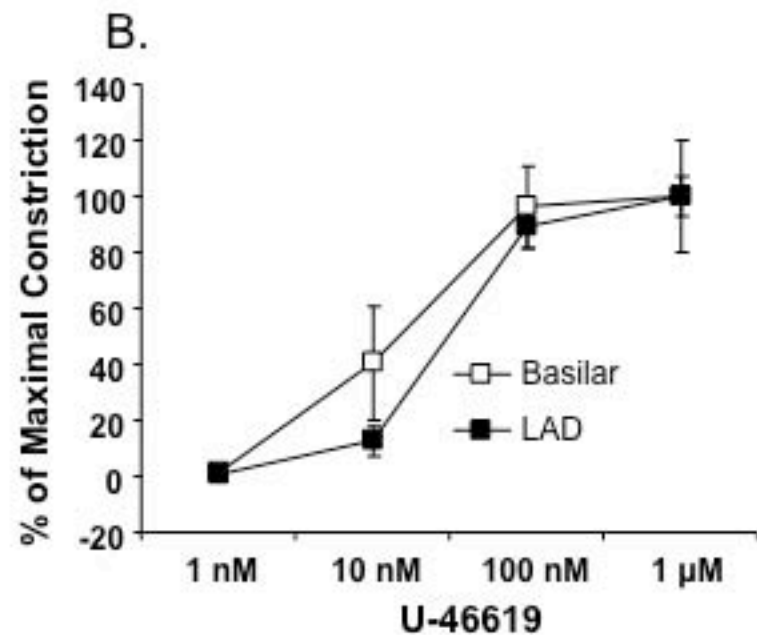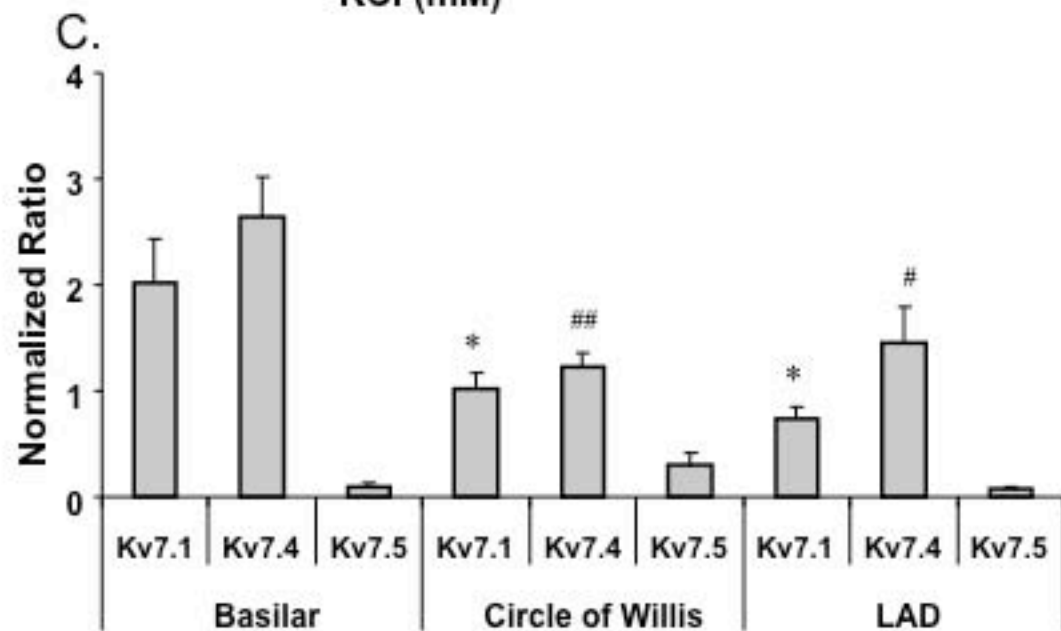

## Supplementary Figure 2.

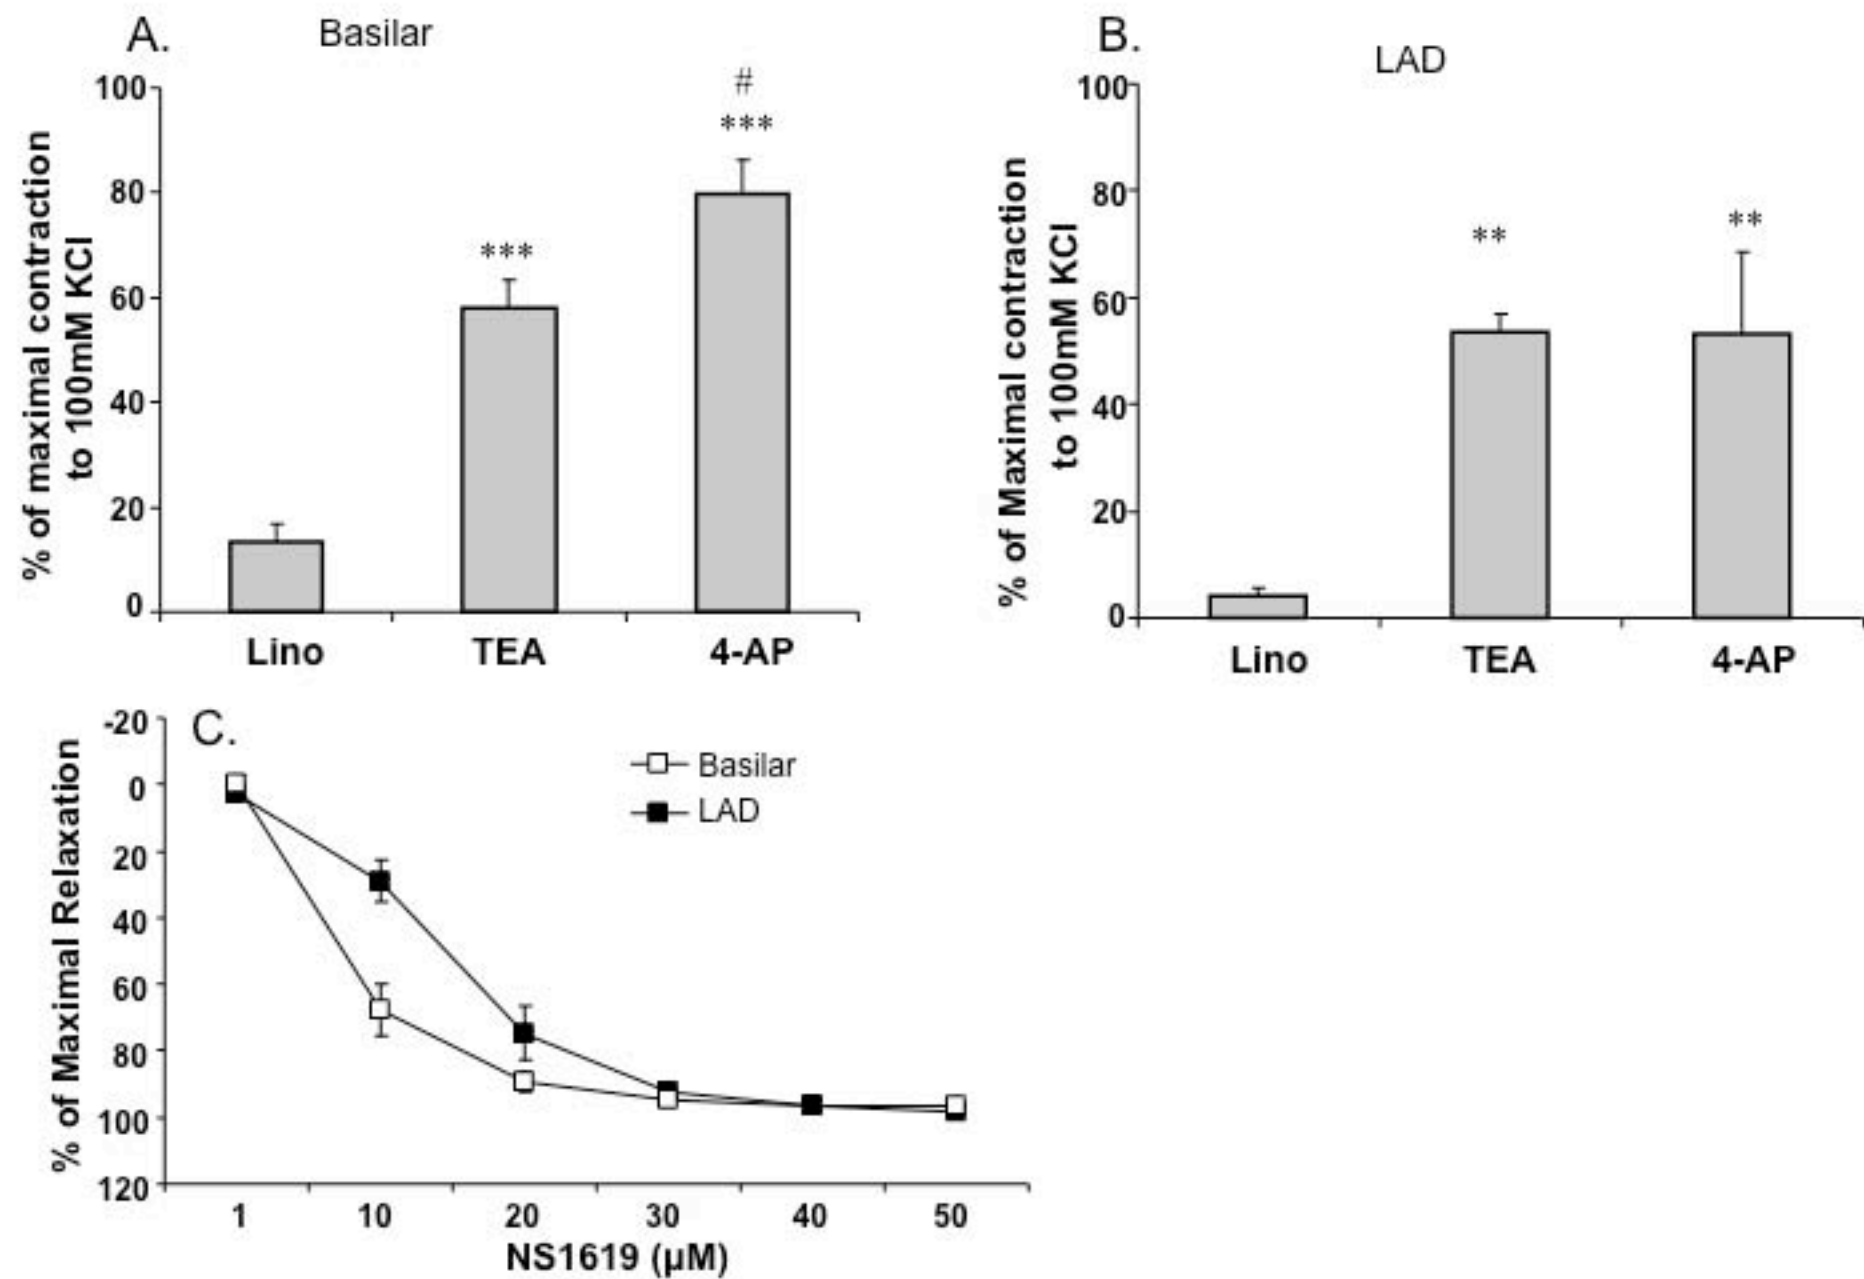

# Supplementary Figure 3

A.

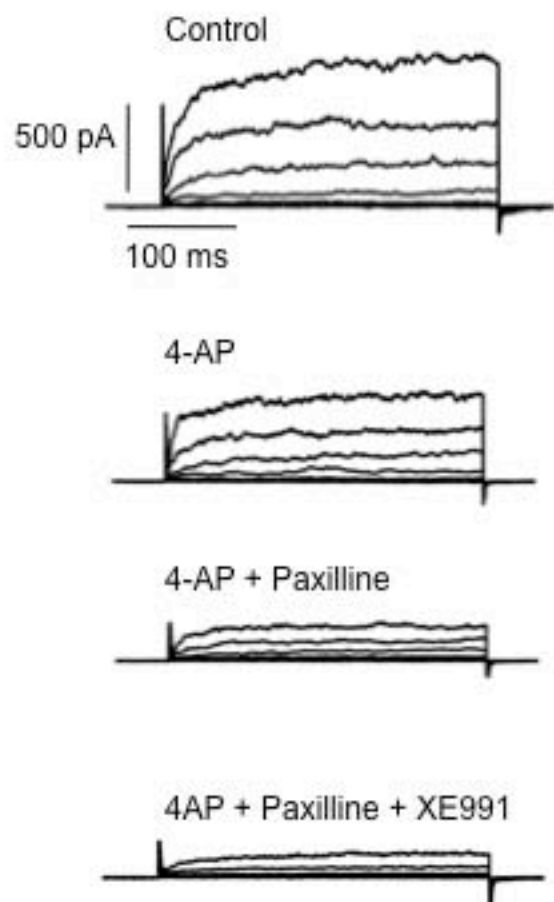

B.

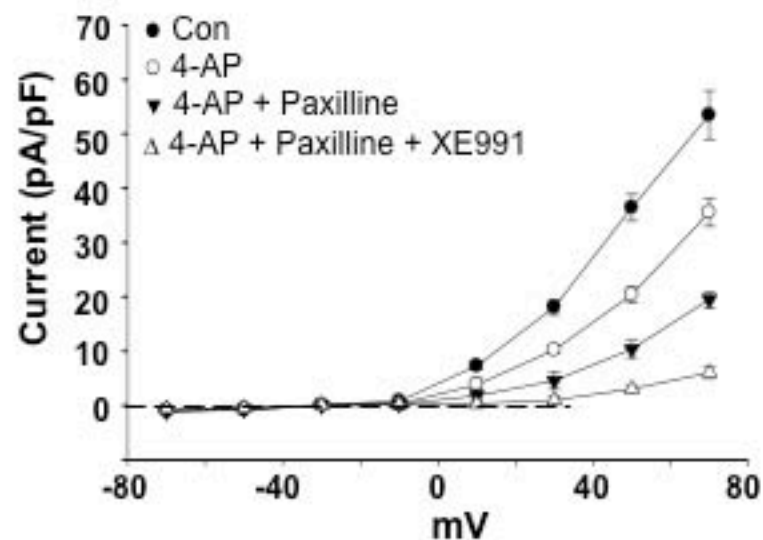

C.

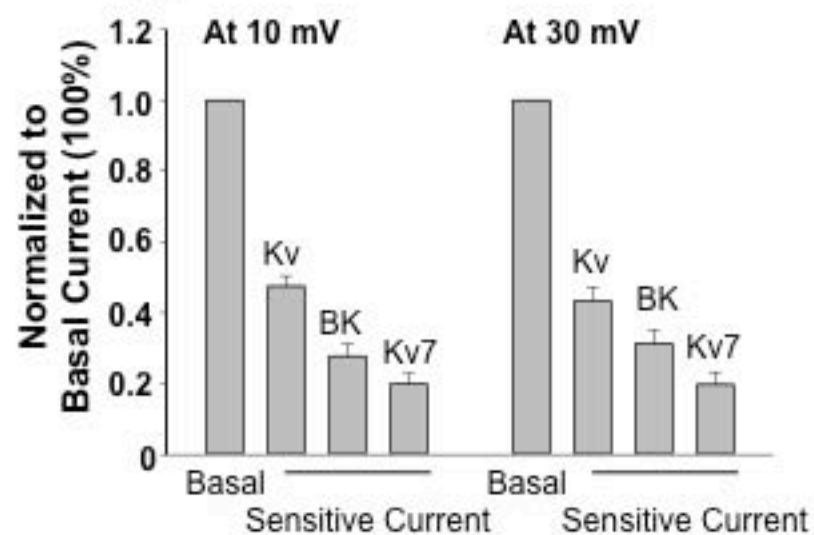

# Supplementary Figure 4

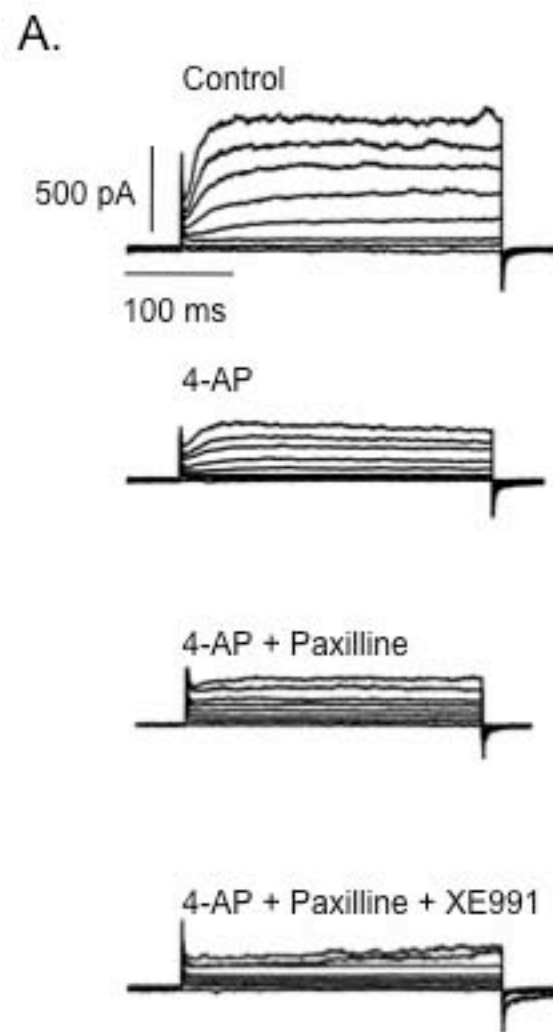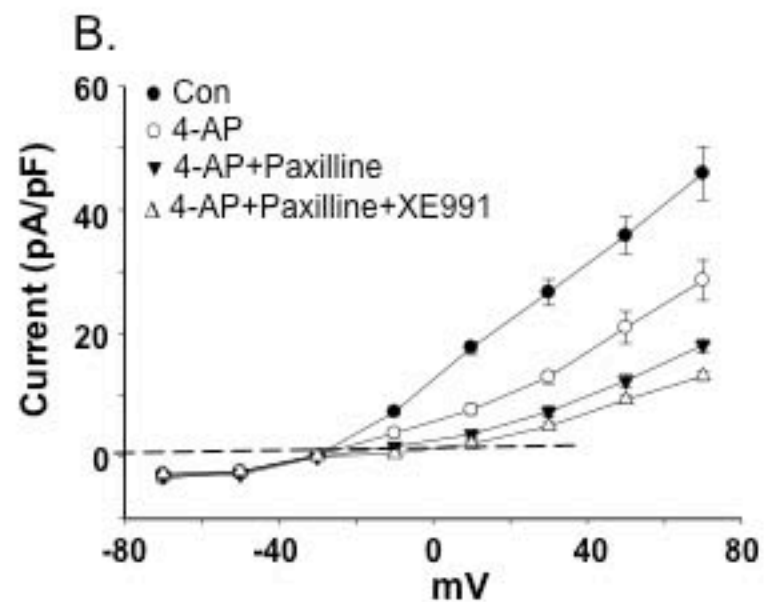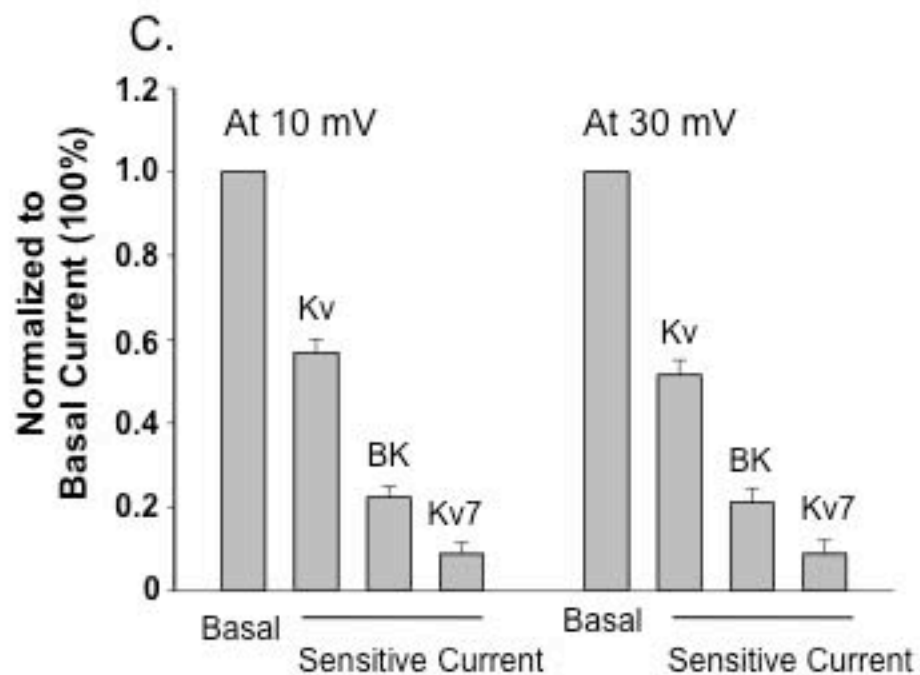

# Supplementary Figure 5

A.

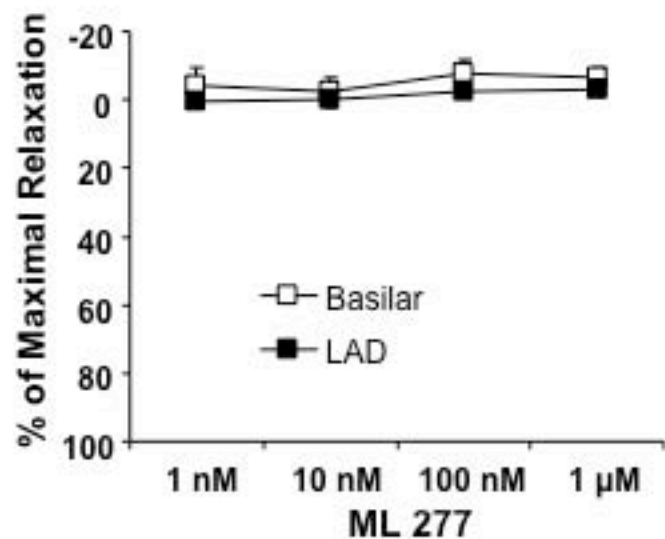

B.

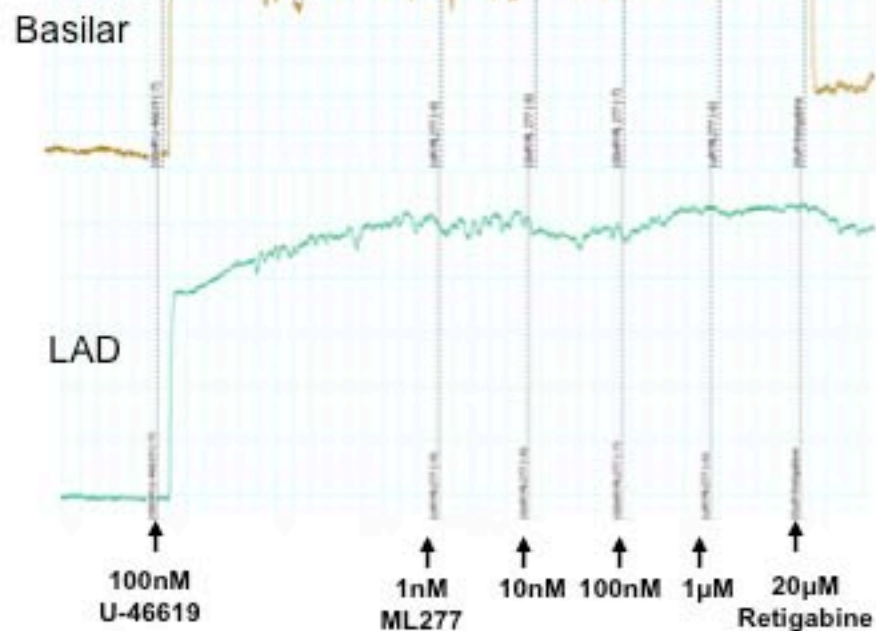

C.

Basilar

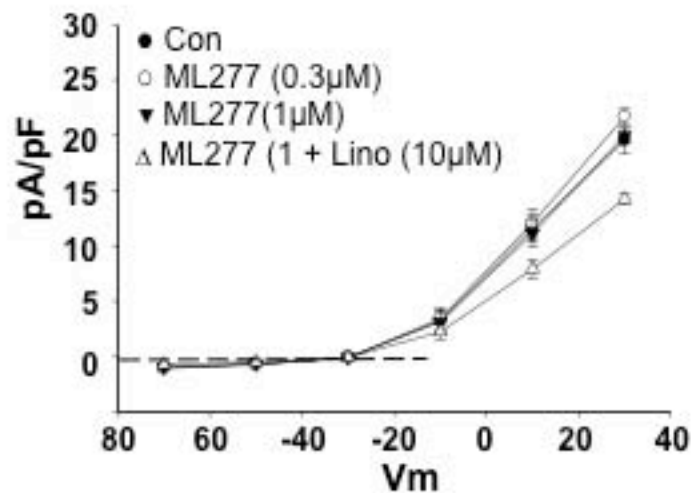

D.

LAD

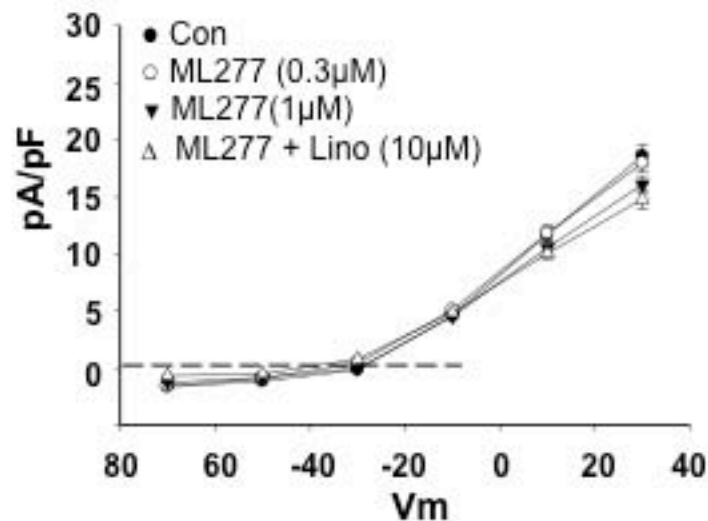

Supplement: NIHMS647420-supplement-Supp_FigureS1-S5.pdf [file NIHMS647420-supplement-Supp_FigureS1-S5.pdf]
